# Supplementary material for: Fibroblast Growth Factor 21 Modulates Microglial Polarization That Attenuates Neurodegeneration in Mice and Cellular Models of Parkinson's Disease
Source: PubMed Central journal article supplement (PMC8727910; doi:10.3389/fnagi.2021.778527), 2021-12-22
Supplement: Image_1.pdf [file Image_1.pdf]

1 **Supplemental Material**

2 **Fibroblast growth factor 21 modulates microglial polarization that attenuates**  
3 **neurodegeneration in mice and cellular models of Parkinson's disease**

4 Changwei Yang<sup>1,2#</sup>, Wuqiong Wang<sup>1#</sup>, Pengxi Deng<sup>1</sup>, Chen Li<sup>1</sup>, Liangcai Zhao<sup>1</sup>,  
5 Hongchang Gao<sup>1\*</sup>

6 <sup>1</sup> Institute of Metabonomics & Medical NMR, School of Pharmaceutical Science,  
7 Wenzhou Medical University, Wenzhou 325035, China;

8 <sup>2</sup> School of Public health, Fujian Medical University, Fuzhou 350122, China;

9

10 # Changwei Yang and Wuqiong Wang contributed equally to this work.

11

12 **\*Correspondence:**

13 Hongchang Gao

14 gaohc27@wmu.edu.cn (H.C. Gao);

15

16 **Running title:** FGF21 attenuates neurodegeneration in PD

17 **Figure list**

18

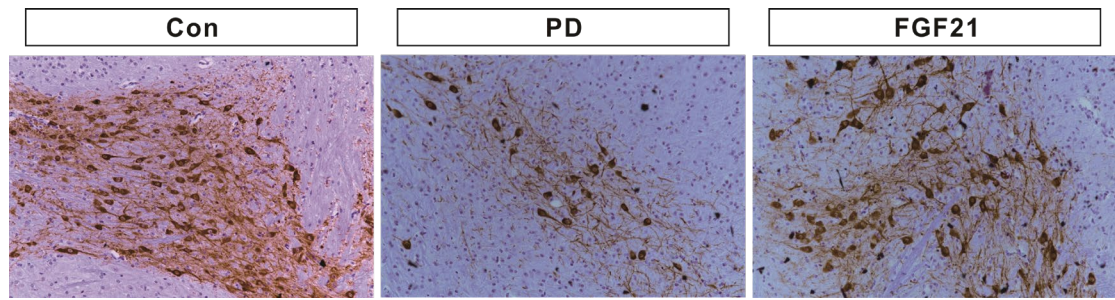

20

21 **Fig S1 High-magnification (400X) images of immunohistochemical staining for**  
22 **Tyrosine hydroxylase (TH) in the midbrain**
